# Supplementary material for: Highly hydrophilic carbon nanoparticles: uptake mechanism by mammalian and plant cells
Source: PubMed Central journal article supplement — RSC Adv. 2018 Oct 15;8(61):35246–56. doi: 10.1039/c8ra06665e (PMC9087372; doi:10.1039/c8ra06665e), 2018-10-15
Supplement: RA-008-C8RA06665E-s001.pdf [file RA-008-C8RA06665E-s001.pdf]

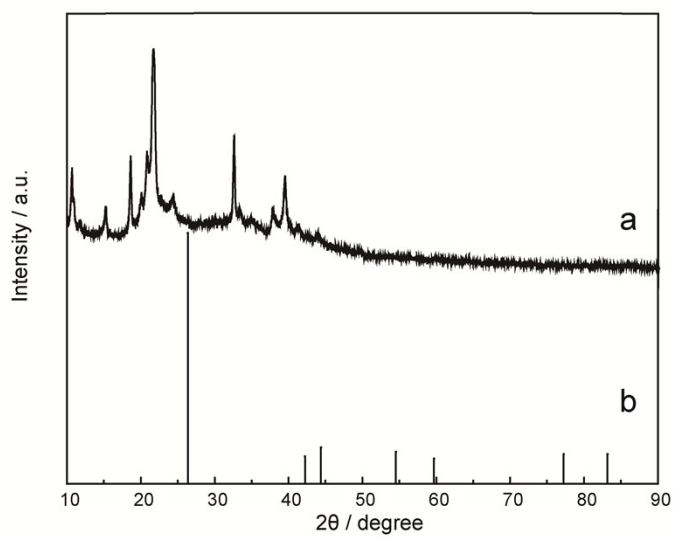

Fig. S1. XRD patterns of the CNPs (a) and graphite (41-1487) (b).

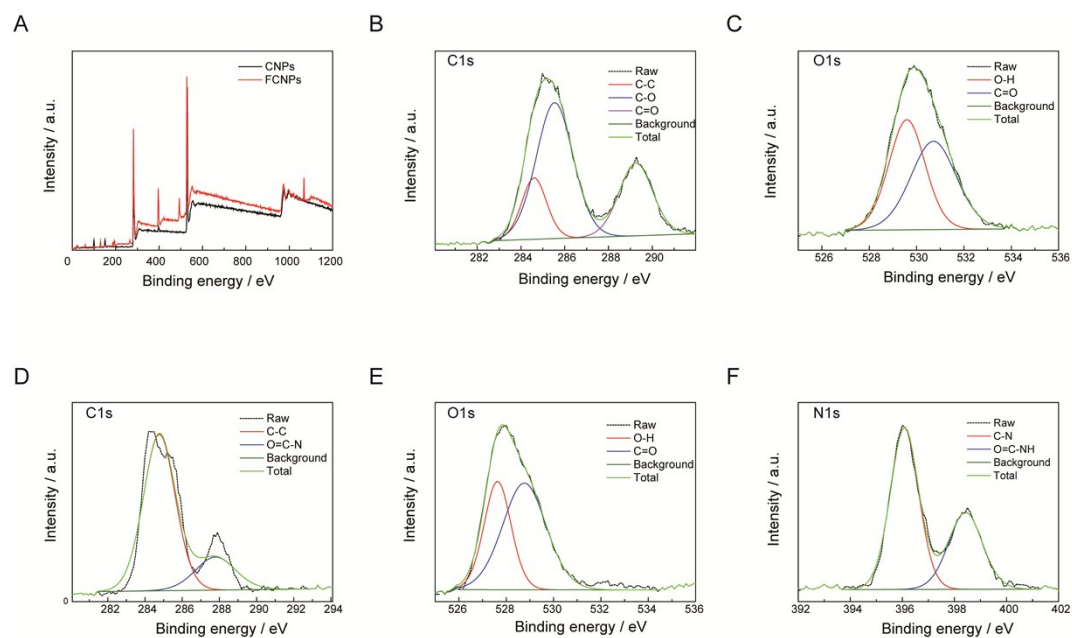

Fig. S2. XPS spectra analysis of CNPs and FCNPs. (A) XPS spectra of CNPs and FCNPs. (B ,C) CNPs high resolution peaks for C1s and O1s. (D, E and F) FCNPs high resolution peaks for C1s, O1s and N1s.

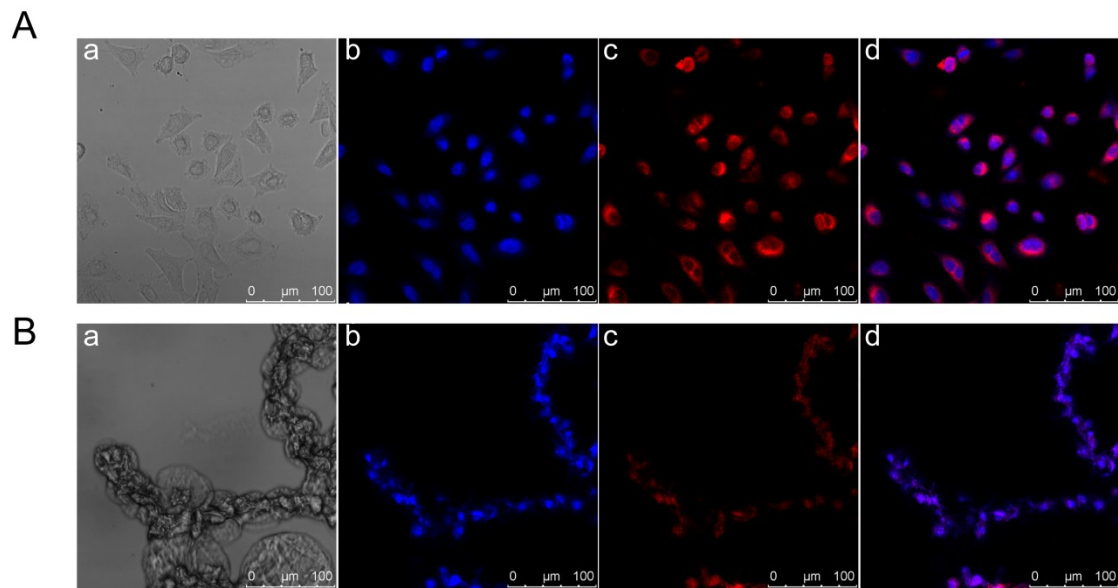

Fig. S3. Colocalization of FCNPs in (A) A549 cells and (B) BY-2 cells after incubation FCNPs for 2h.(a)bright field (b) stained with DAPI (c) stained with FCNPs, (d) merged images of (b) and (c).
